# Supplementary material
Source: ML conference proceedings conference paper supplement (https://openaccess.thecvf.com/content/ICCV2021/html/Zhou_Specificity-Preserving_RGB-D_Saliency_ICCV_2021_paper.html)
Supplement: Supplementary file 1 [file Zhou_Specificity-Preserving_RGB-D_Saliency_ICCV_2021_supplemental.pdf]

# Specificity-preserving RGB-D Saliency Detection

Tao Zhou<sup>1</sup>, Huazhu Fu<sup>2</sup>, Geng Chen<sup>2</sup>, Yi Zhou<sup>3</sup>, Deng-Ping Fan<sup>2\*</sup>, Ling Shao<sup>2</sup>

<sup>1</sup>PCA lab, The Key Laboratory of Intelligent Perception and Systems for High-Dimensional Information of MoE, School of Computer Science and Engineering, Nanjing University of Science and Technology, China

<sup>2</sup>IIAI, Abu Dhabi, UAE

<sup>3</sup>School of Computer Science and Engineering, Southeast University, China

For a clear view, we only show PR and F-measure curves of 14 RGB-D saliency detection methods (including 13 state-of-the-art models and our method) in the manuscript. Here, we show complete PR and F-measure curves of 28 benchmarking methods (except MDSF and DTM, due to their saliency maps are not available) and our method, in our supplementary materials. The results, shown in Figs. 1 and 2, indicate that our method outperforms all the comparison saliency detection approaches.

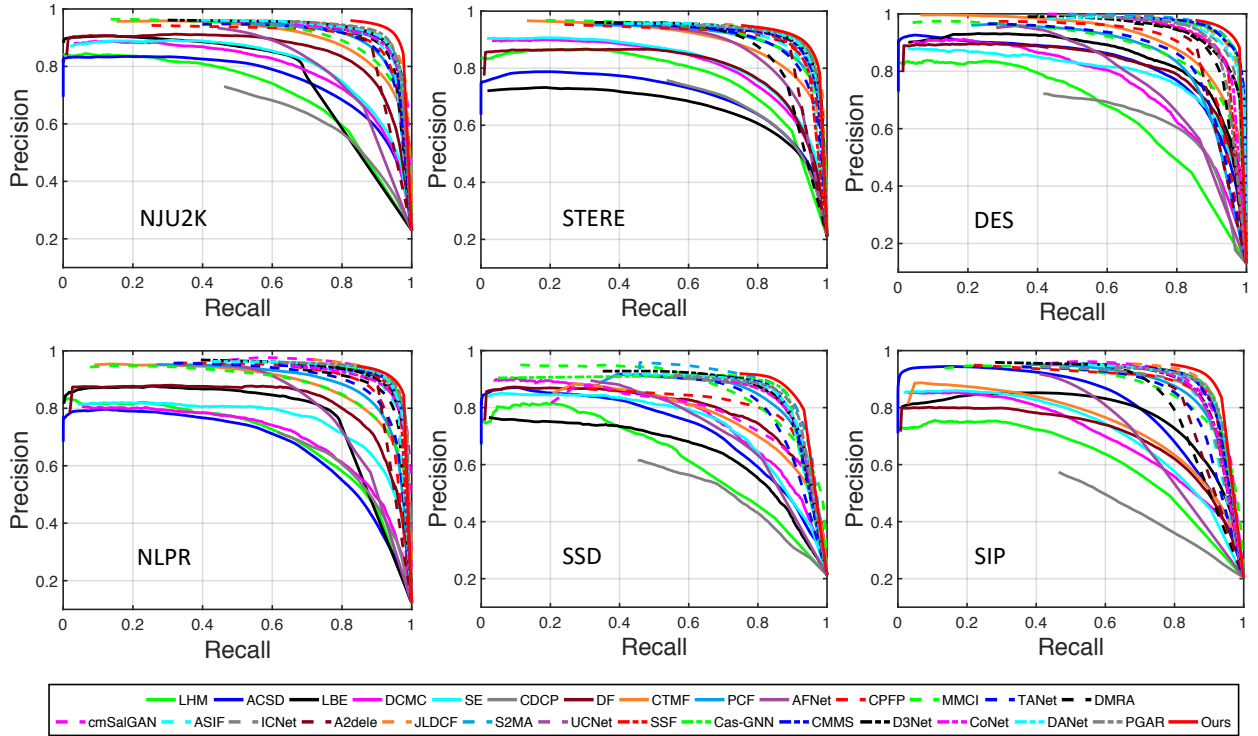

Figure 1: PR curves on NJU2K, STERE, DES, NLPR, SSD and SIP datasets.

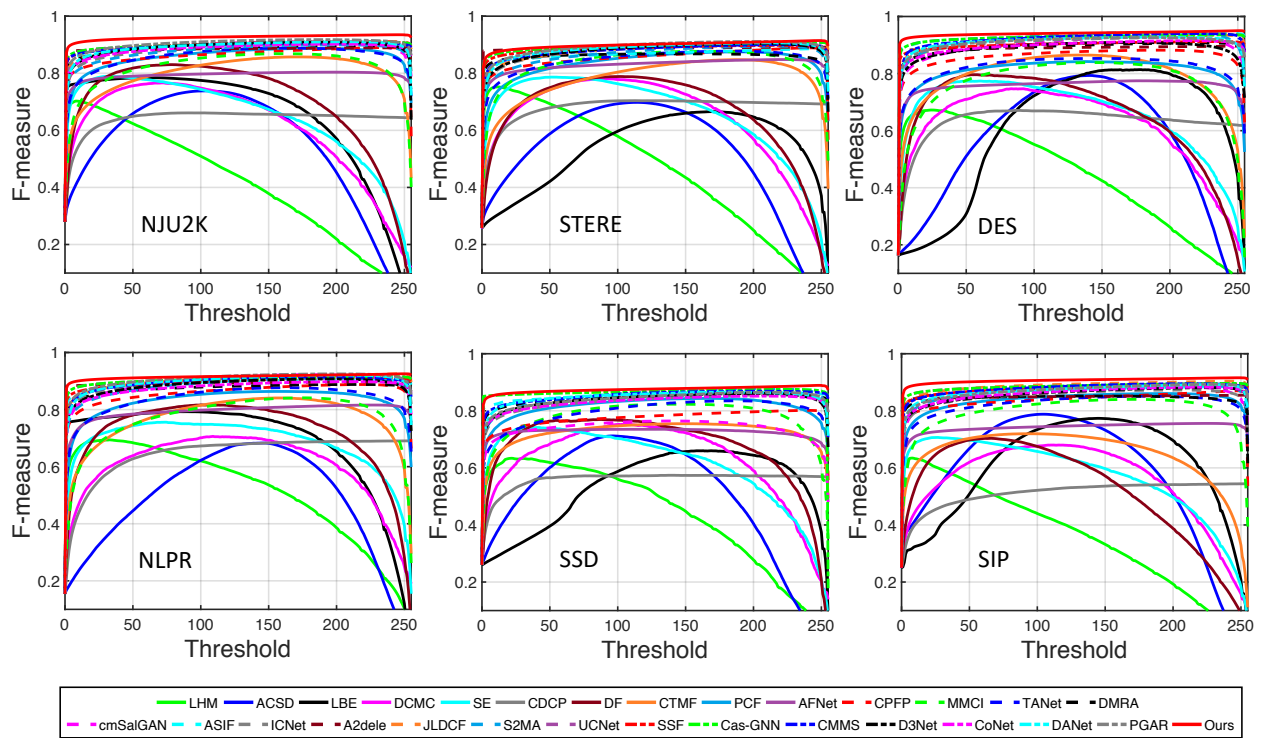

Figure 2: F-measure curves of on NJU2K, STERE, DES, NLPR, SSD and SIP datasets.
